# Supplementary material for: Defective proteostasis in induced pluripotent stem cell models of frontotemporal lobar degeneration
Source: PubMed Central journal article supplement (PMC9734180; doi:10.1038/s41398-022-02274-5), 2022-12-10

# Supplemental Figure 4

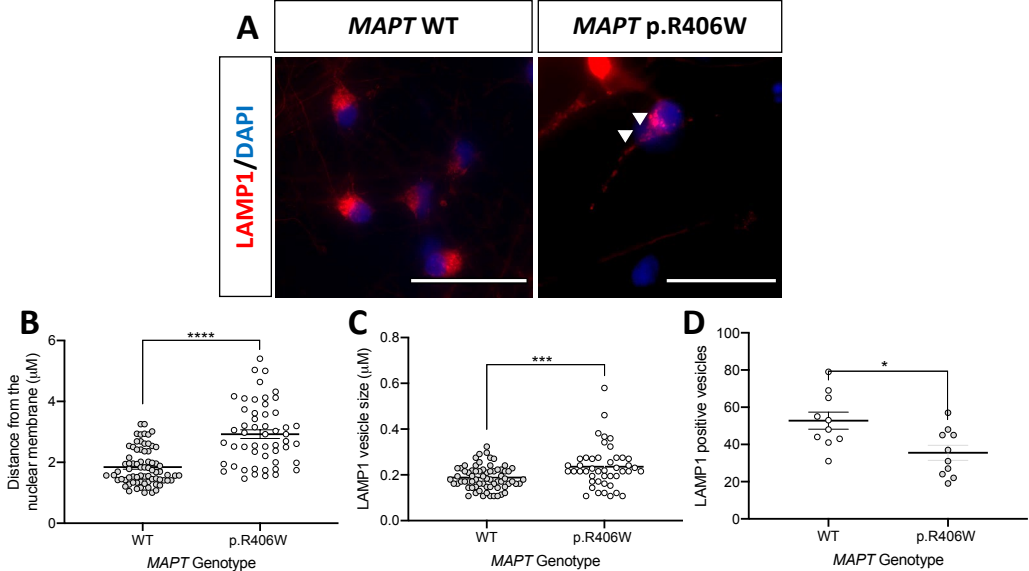

Supplement: 41398_2022_2274_MOESM5_ESM.pdf [file 41398_2022_2274_MOESM5_ESM.pdf]
